# Supplementary material for: An enhanced plasmonic photothermal effect for crystal transformation by a heat-trapping structure
Source: Royal Society of Chemistry journal article supplement (doi:10.1039/d0nr06714h), 2021-01-01
Supplement: d0nr06714h1.pdf [file d0nr06714h1.pdf]

## Support Information

### Enhanced plasmonic photothermal effect for crystal transformation by heat-trapping structure

Ting Kong<sup>a</sup>, Chengyun Zhang<sup>a</sup>, Jiangbo Lu<sup>a</sup>, Bowen Kang<sup>a</sup>, Zhengkun Fu<sup>a</sup>, Jinping Li<sup>a</sup>, Lei Yan<sup>a</sup>, Zhenglong Zhang<sup>a,\*</sup>, Hairong Zheng<sup>a,\*</sup>, Hongxing Xu<sup>b,a</sup>

<sup>a</sup>School of Physics and Information Technology, Shaanxi Normal University, 710119, Xi'an, China

<sup>b</sup>School of Physics and Technology, Wuhan University, 430072, Wuhan, China

\*Corresponding authors: [zhangzl@snnu.edu.cn](mailto:zhangzl@snnu.edu.cn); [hrzheng@snnu.edu.cn](mailto:hrzheng@snnu.edu.cn)

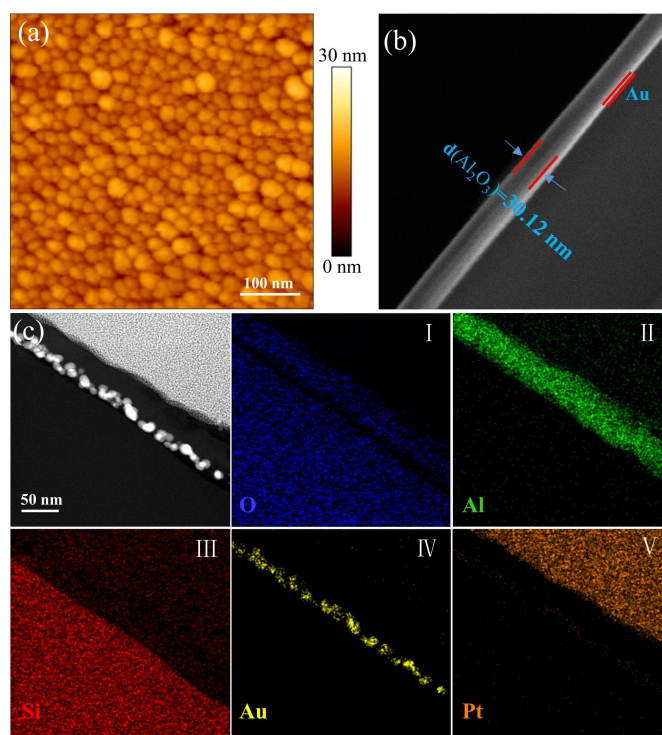

**Fig. S1** (a) AFM image of AuNIs annealed at 300 °C, the average size of the nanoparticles is about 10 nm and the average roughness values is 1.47 nm; (b) SEM image of a cross-section of heat-trapping structure, it shows that the thickness of Al<sub>2</sub>O<sub>3</sub> is 30 nm; (c) HAADF-STEM image and EDX elemental mapping of the cutted cross-section heat-trapping structure, the substrate is

Si/SiO<sub>2</sub> and the Pt served as a protective layer is introduced to the structure during cutting the sample.

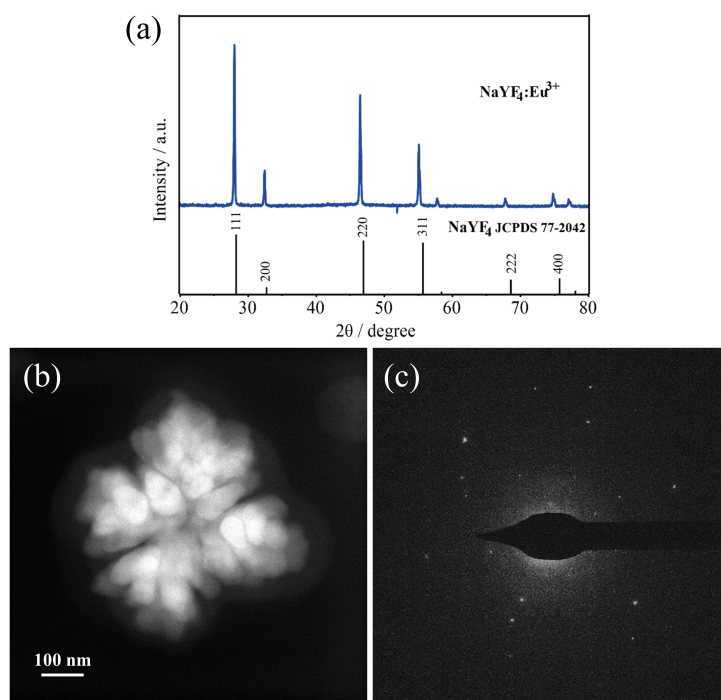

**Fig. S2** (a) XRD pattern of as-synthesized NaYF<sub>4</sub>:Eu<sup>3+</sup> sub-microcrystal and the standard pattern of cubic phase NaYF<sub>4</sub> (JCPDS No.77-2042); (b) HAADF-STEM image and (c) SAED pattern of NaYF<sub>4</sub>:Eu<sup>3+</sup> sub-microcrystal, respectively. The results indicate that NaYF<sub>4</sub> is polycrystalline.

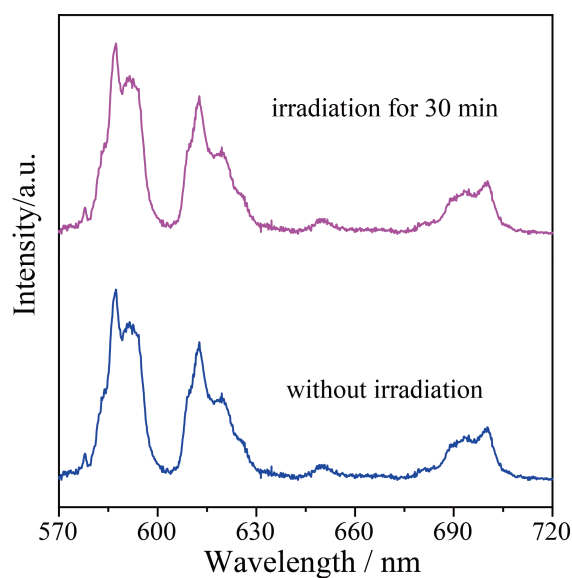

**Fig. S3** Luminescence spectra of NaYF<sub>4</sub>:Eu<sup>3+</sup> on glass substrate without AuNIs before and after laser irradiation (30 min) by heat trapping layer of Al<sub>2</sub>O<sub>3</sub>. No changes are observed in the

luminescence spectra for glass substrate with Al<sub>2</sub>O<sub>3</sub> even after laser irradiation for 30 min, which indicates the plasmonic AuNIs plays an important role in crystal transformation.

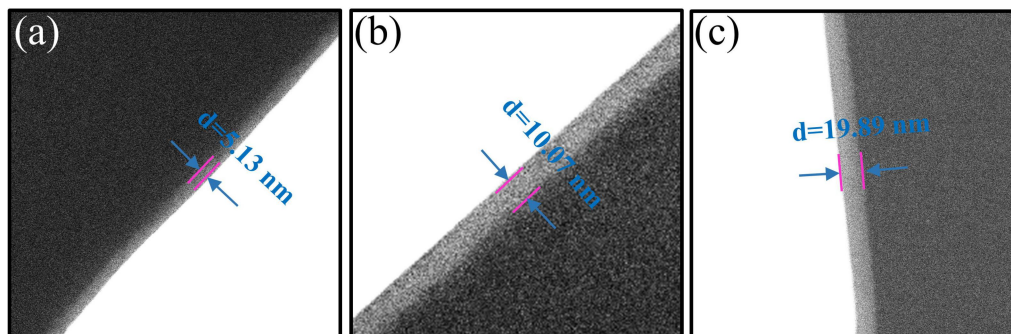

**Fig. S4** (a-c) HAADF-STEM images of cross-section of heat-trapping structure, the thickness of Al<sub>2</sub>O<sub>3</sub> is 5 nm, 10 nm and 20 nm, respectively. It is almost consistent with the set values about the thickness of Al<sub>2</sub>O<sub>3</sub>.

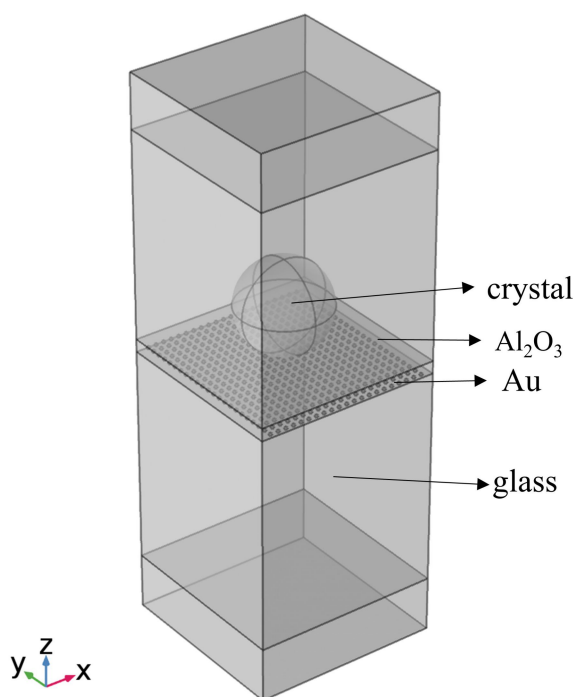

**Fig. S5** The simulation model of heat-trapping structure. The AuNIs is built as Au NPs array with a diameter of 20 nm and the crystal is approximately built as a sphere with a diameter of 500 nm. The thickness of Al<sub>2</sub>O<sub>3</sub> is 50 nm. The glass layer at the bottom of the model is under the Au NPs, and the Al<sub>2</sub>O<sub>3</sub> layer is above the Au NPs. The crystal is placed on the top of Al<sub>2</sub>O<sub>3</sub> layer. In order

to clarify the heat transfer mechanism of heat-trapping structure more clearly, only the Au NPs arrays are shown in the Fig.5a.

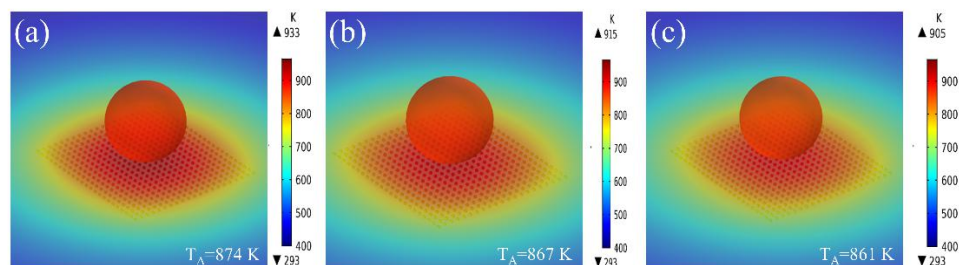

Fig. S6. (a-c) The temperature distributions of heat-trapping structure with  $\text{Al}_2\text{O}_3$  layer thickness of 30, 40 and 50 nm, respectively.  $T_A$  is the average temperature of the crystal and the symbols “▲” in the scale bar represents the maximum temperature of the whole system. The average temperatures of crystal are stable at around 870 K when the thickness of  $\text{Al}_2\text{O}_3$  is 30-50 nm. Such a slight change in the temperature of crystal is not sufficient to affect the crystal transformation time. Therefore, the transformation time will not change for the thickness of  $\text{Al}_2\text{O}_3$  from 30 to 50 nm in experiments and simulations.

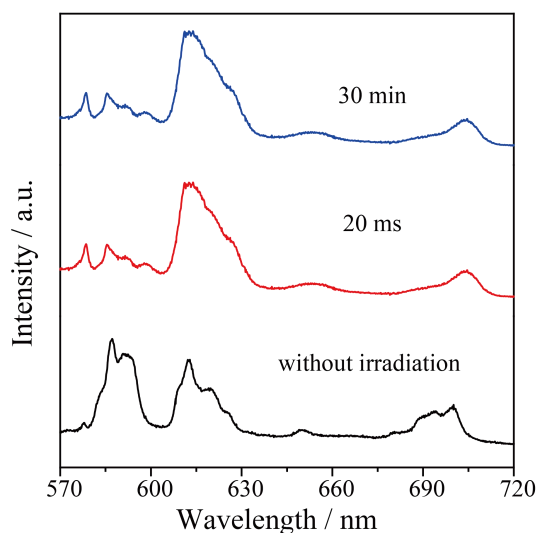

**Fig. S7** *In-situ* luminescence spectra with and without laser irradiation of  $\text{NaYF}_4:\text{Eu}^{3+}$  sub-microcrystal on AuNIs with dielectric layer of  $\text{SiO}_2$  substrate (50 nm).

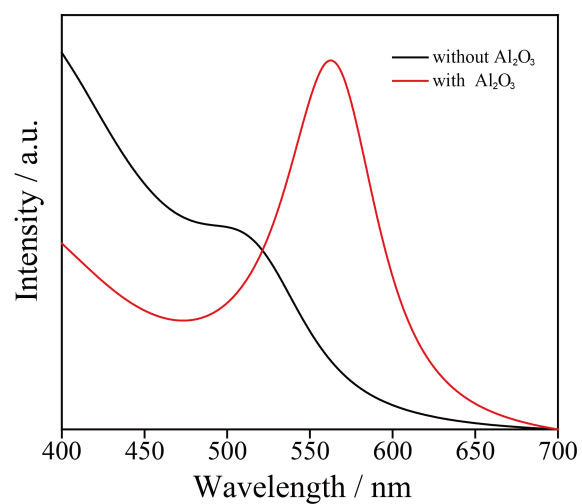

**Fig. S8** Simulation of normalized absorption spectra of AuNIs with and without heat-trapping layer of Al<sub>2</sub>O<sub>3</sub>. It is obviously seen that the LSPR peak is red-shifted and the light absorption is greatly improved by assistance of Al<sub>2</sub>O<sub>3</sub>.
